# Supplementary material
Source: HighWire-hosted journal article supplement (https://cmajopen.ca/highwire/filestream/90595/field_highwire_adjunct_files/0/open-2022-0136-original-submission.pdf)
Supplement: open-2022-0136-original-submission.pdf [file open-2022-0136-original-submission.pdf]

1  
2  
3 **Diagnosing Lynch syndrome in Nova Scotia endometrial cancer patients: An**  
4 **interdisciplinary audit**  
5

6 Marianne Levesque, MD<sup>1,2</sup>  
7

8 Richard Wood, MD<sup>2,3</sup>  
9

10 Michael D. Carter, MD PhD FRCPC<sup>2,3</sup>  
11

12 Jo-Ann Brock, MD PhD FRCSC<sup>1,3</sup>  
13

14 Katharina Kieser, MD MSc FRCSC<sup>2,5</sup>  
15

16 **Affiliations:**

- 17  
18 1. Department of Obstetrics and Gynecology, Dalhousie University Halifax, Nova Scotia  
19 2. Nova Scotia Health Authority, Halifax, Nova Scotia  
20 3. Department of Pathology, Dalhousie University, Halifax, Nova Scotia  
21 4. Maritime Medical Genetics Service, IWK Health Centre, Halifax, Nova Scotia  
22 5. Department of Obstetrics and Gynecology, Division of Gynecologic Oncology,  
23 Dalhousie University, Halifax, Nova Scotia  
24  
25

26 **Corresponding author:**

27  
28 Katharina Kieser  
29 Room 5004 Dickson Building  
30 5820 University Avenue  
31 Halifax, Nova Scotia, B3H 1V7  
32  
33

34  
35 **Acknowledgements:**

36 We would like to acknowledge Erin Chamberlain, a Canadian certified genetic counsellor  
37 (CCGC) with the Maritime Medical Genetics Service (MMGS), for her contribution to the study  
38 by providing medical genetics data and insight from a medical genetics perspective.  
39  
40  
41  
42

43 **Funding:**

44 Funding for this study was obtained from the Department of Obstetrics and Gynecology at  
45 Dalhousie University, Halifax, Nova Scotia.  
46  
47  
48  
49

50 **Declaration of competing interests:**

51 None of the authors have competing interests to declare.  
52  
53  
54  
55  
56  
57  
58  
59  
60

## Abstract

**Background:** Diagnosing Lynch syndrome allows for implementation of risk-reducing strategies for patients and their families. This study aimed to determine the incidence of Lynch syndrome in Nova Scotia women with endometrial cancer, and to evaluate the appropriateness of investigations and referrals offered to them.

**Methods:** All patients diagnosed with endometrial cancer in Nova Scotia between May 1, 2017 and April 30, 2020 were identified through a provincial gynecologic oncology database. Patients from out-of-province were excluded. The following information was collected on all patients: Age, body mass index, tumor mismatch repair protein immunohistochemistry results, personal and family histories, and germline testing information. Total numbers and percentages were reported for all variables.

**Results:** During the study period, 465 women were diagnosed with endometrial cancer. Most were  $\geq 60$  years old, had obesity, and had low grade, early stage, endometrioid tumors. Tumor immunohistochemistry was performed in 95.5% of cases. Based on local criteria, 269 patients were eligible for genetic counseling. Appropriate referral was offered to 66.5% of eligible women. Germline testing was performed in 95 patients. Ten patients were diagnosed with Lynch syndrome.

**Interpretation:** The incidence of Lynch syndrome was 2.2% in this population. This may be an underestimation given that fewer than half of eligible women underwent germline testing. Creating clinical pathways that ensure genetic counselling access to all eligible patients is necessary for prompt diagnosis of Lynch syndrome. This will allow for implementation of risk prevention strategies, and, in cases of advanced disease, help optimize treatment.

## Introduction

Endometrial cancer is the fourth most common malignancy among Canadian women (1). A small proportion of all endometrial cancer cases are associated with hereditary syndromes, most commonly Lynch syndrome (2). Lynch syndrome is an autosomal dominant inherited syndrome caused by inactivating mutations in DNA mismatch repair (MMR) genes. These genes include *MLH1*, *MSH2*, *MSH6*, and *PMS2*, as well as large deletions in *EPCAM* which can lead to transcriptional silencing of *MSH2* (3). Harboring a pathogenic germline mutation in a MMR gene confers a high risk of developing a somatic “second hit” mutation, with subsequent genomic instability and development of cancer in affected individuals (3). The incidence of Lynch syndrome in patients affected with endometrial cancer is approximately 2-3% (4,5).

Lifetime risks of endometrial cancer for women with Lynch syndrome is 40-60% (6). Women with Lynch syndrome are also at an increased risk of ovarian cancer and other Lynch-related cancers such as small bowel, stomach, pancreas and urothelial malignancies (6). Identifying affected individuals is crucial to the management of their care and that of their affected relatives, as many cancer risk-reducing strategies are available.

Tumor immunohistochemistry (IHC) testing for expression of *MLH1*, *MSH2*, *MSH6*, and *PMS2* via their protein products has been widely used to triage individuals at risk of Lynch syndrome. Traditionally, patients were triaged for germline testing using clinical criteria, however up to 15-30% of endometrial cancer patients with Lynch syndrome do not fulfill these criteria(7). For this reason, one of the recommended strategies to identify individuals who should be offered germline testing is to perform tumor IHC for all endometrial cancer patients, regardless of age(7).

1  
2  
3  
4  
5  
6  
7  
8  
9  
10  
11  
12  
13  
14  
15  
16  
17  
18  
19  
20  
21  
22  
23  
24  
25  
26  
27  
28  
29  
30  
31  
32  
33  
34  
35  
36  
37  
38  
39  
40  
41  
42  
43  
44  
45  
46  
47  
48  
49  
50  
51  
52  
53  
54  
55  
56  
57  
58  
59  
60

There are two different approaches to IHC testing. The four-antibody approach targets all four, *MLH1*, *MSH2*, *MSH6*, and *PMS2*, proteins. The two-antibody approach targets only the minor heterodimer partners *PMS2*, which binds to *MLH1*, and *MSH6*, which binds to *MSH2*, under the premise that expression of a minor partner is lost alongside its partner, but not vice versa(8). In other words, positivity for these two markers implies intact expression of their counterparts whereas *PMS2* is lost in virtually all *MLH1*-deficient tumors, and likewise for *MSH6* in *MSH2*-deficient tumors. Loss of either *PMS2* or *MSH6* in this paradigm triggers IHC for the other two immunostains (*MLH1*, *MSH2*) so as to fully characterize the pattern of MMR loss(8).

In Nova Scotia, tumor IHC has been performed on all endometrial carcinomas, including carcinosarcomas, since April 6, 2017. Women found to have loss of expression of any of the above four MMR proteins are subsequently referred to medical genetics for consideration of germline testing. Other criteria used to identify patients that should be referred for genetic counselling include: Personal history of other Lynch-associated malignancy, family history of Lynch-associated malignancies, and age less than 60. To our knowledge, the incidence of Lynch syndrome in the Nova Scotia endometrial cancer population has never been described. We aimed to characterize our local endometrial cancer population, clarify the incidence of Lynch syndrome in this population and to evaluate how effectively women identified at increased risk of Lynch syndrome were appropriately referred and investigated for the condition.

## Methods

Ethics approval for the study was obtained from the Nova Scotia Health Research Ethics Board (File #1026033).

1  
2  
3 This was a population-based descriptive study using Nova Scotia data. In this province,  
4 all women affected with a gynecological malignancy have their pathology reviewed and are  
5 typically treated in one centre – the Nova Scotia Cancer Centre (NSCC) in Halifax. The  
6 gynecologic oncologists at the NSCC enter data on all patients with a diagnosis of gynecological  
7 malignancy in a database called the Tupper Gynecology Oncology Database. The database  
8 regularly gets audited for accuracy. Data collected includes patient demographics such as age  
9 and body mass index (BMI), primary diagnosis, histology, staging and treatments.  
10  
11  
12  
13  
14  
15  
16  
17  
18  
19

20 We used the Tupper Gynecology Oncology Database to generate a list of all patients  
21 diagnosed with endometrial cancer between May 1, 2017 and April 30, 2020. Pertinent  
22 demographic and clinical information (i.e. age and BMI at time of diagnosis, histology, FIGO  
23 grade and FIGO stage) were also extracted from this database. A chart review was then  
24 performed for each patient to confirm eligibility and collect any missing information. Tumor  
25 MMR IHC testing results for each patient, was extracted from pathology reports. Germline  
26 testing results, and information regarding family history and/or personal history of Lynch-  
27 associated malignancies for all eligible patients, based on above mentioned criteria, were  
28 extracted from medical genetics records. Patients with a health card number from any province  
29 other than Nova Scotia were excluded.  
30  
31  
32  
33  
34  
35  
36  
37  
38  
39  
40  
41  
42  
43

44 Age and BMI are reported using mean and range. Total number and percentage are  
45 reported for: histologic subtype and grading, staging (i.e. stage I, stage II, stage III, and stage  
46 IV), personal history of any other Lynch syndrome-associated cancer, presence of high-risk  
47 family history (i.e. first-degree relatives with Lynch syndrome-associated cancer diagnosed  
48 before the age of 50, or more than two first or second-degree relatives with Lynch syndrome-  
49 associated cancer diagnosed at any age), testing performed (i.e. no testing performed, tumor  
50  
51  
52  
53  
54  
55  
56  
57  
58  
59  
60

MMR testing only, both tumor MMR and germline MMR gene mutation testing, or germline MMR gene mutation testing only), response to offered germline testing (i.e. accepted, declined, not offered), indication for germline testing (i.e. tumor MMR defects, personal or family history of Lynch-related malignancy, or other), tumor IHC staining results for *MLH1*, *MSH2*, *MSH6*, and *PMS2*, and germline MMR gene mutation testing results, specifically for Lynch syndrome (i.e. positive, negative, or unknown).

## Results

A total of 475 women were identified through the Tupper Gynecology Oncology Cancer Database as having received a new diagnosis of endometrial cancer between May 1, 2017 and April 30, 2020. Ten patients were excluded – (three from outside Nova Scotia and seven who did not have a diagnosis of endometrial cancer), yielding a final cohort of 465 women. Most were older than 60 years at time of diagnosis, however 35.7% were aged 60 or less. Most women were affected with obesity (65%) and the majority of tumors were of endometrioid histology (85.6%), FIGO grade 1 (65.4%) and FIGO stage 1 (72.7%). Personal and family history was unknown in 314 and 321 cases, respectively (Table 1).

IHC staining was performed in 444 patients (95.5%), using a two-stain panel for *MSH6* and *PMS2* in 267 patients and a four-stain panel for *MLH1*, *PMS2*, *MSH2* and *MSH6* in 177 patients (Figure 1). A total of 118 patients (26.6 %) were found to have loss of expression of at least one protein. Different patterns of protein expression loss included: loss of both *MLH1* and *PMS2* (83.1 %), loss of both *MSH2* and *MSH6* (less than 5%), isolated *PMS2* loss (less than 5%), isolated *MSH6* loss (less than 5%), isolated *MSH2* loss (less than 5%) and a loss of *MLH1*, *PMS2*, and *MSH6* (less than 1%).

1  
2  
3 Based criteria for referral in Nova Scotia, 269 women were eligible for a medical  
4 genetics consultation. At least 179 women (66.5% of eligible patients) were referred for  
5 consultation with medical genetics, with 166 having received genetic counseling at time of the  
6 study. Ninety patients were not offered a referral to medical genetics. Following consultation,  
7 germline testing was offered to 142 women (52.8% of eligible patients), 95 (66.9% of patients  
8 offered testing) of whom accepted the offered testing (Figure 1). Ten patients were confirmed to  
9 have Lynch syndrome based on germline testing results, which corresponds to 10.5% of women  
10 tested and to 2.2% of the study population.  
11  
12  
13  
14  
15  
16  
17  
18  
19  
20  
21

## 22 Discussion

23  
24 This study describes characteristics of Nova Scotia women diagnosed with endometrial  
25 cancer between 2017 and 2020, the incidence of Lynch syndrome in this population, and the  
26 appropriateness of investigations and medical genetics referral offered to them. The average age  
27 at time of diagnosis was 63, almost two thirds had a BMI  $\geq 30$  kg/m<sup>2</sup> (65%) and the most  
28 common histological subtype was endometrioid (85.6%). Personal and family history of Lynch-  
29 associated malignancies were unknown in more than two thirds of women. Tumor IHC staining  
30 was performed in 95.5% of the population to screen for Lynch syndrome. Of all screened tumors,  
31 26.6% (n = 118) were found to have MMR protein defects. Using both IHC and clinical criteria,  
32 90 of 269 eligible women (33.1%) were not referred for genetic counselling. Of women referred  
33 for genetic counseling (n = 179), 24 were not offered germline testing (13.4%); 10 did not meet  
34 criteria for germline testing, 9 were previously known to medical genetics for other reasons, and  
35 the remainder were lost to follow up. Germline testing confirmed 10 cases of Lynch syndrome.  
36  
37  
38  
39  
40  
41  
42  
43  
44  
45  
46  
47  
48  
49  
50

51  
52 Demographics of our population were similar to other populations previously described  
53 (4,9–14). Our assessment of clinical risk factors was limited due to inconsistent recording of  
54  
55  
56  
57  
58  
59  
60

1  
2  
3 patients' personal and family history of Lynch-related malignancies in medical records. Tumor  
4  
5 IHC has been demonstrated to be the most effective screening strategy for Lynch  
6  
7 syndrome(7,11,14,15), however, family history remains clinically relevant. A small number of  
8  
9 patients may be missed when relying on IHC staining alone(11,14), as IHC staining may be  
10  
11 intact for some non-functioning mutant proteins(16). Highlighting this potential pitfall, intact  
12  
13 MMR protein expression was observed in 3 out of 10 patients who were subsequently found to  
14  
15 have Lynch syndrome. The incidence of Lynch syndrome in the population was 2.2%, which is  
16  
17 similar to that described in an American study of women with endometrial cancer(4,5) but,  
18  
19 interestingly, less than half the prevalence of 5.0% recently reported in a cohort of Quebec  
20  
21 women (17) .The positive predictive value of germline testing for pathological variants in *MLH1*,  
22  
23 *MSH2*, *MSH6*, *PMS2* and *EPCAM* in our population was 10.5%.

24  
25  
26  
27  
28  
29 Germline status remains unknown in 174 women; 90 were not referred to medical  
30  
31 genetics, 24 were not offered testing, 13 have a pending appointment for genetic counseling and  
32  
33 47 declined germline testing (Figure 1). We therefore suspect the results to be an underestimate  
34  
35 of the true prevalence of Lynch syndrome in Nova Scotia women presenting with endometrial  
36  
37 cancer. It was not feasible as part of this study to determine the reason patients did not receive  
38  
39 referrals for genetic counselling. While the reasons for lack of referral to medical genetics are  
40  
41 unknown, some patients may have been too unwell, and/or declined referral for consultation with  
42  
43 medical genetics. It is also possible that some patients may not have been referred to medical  
44  
45 genetics because of suspected somatic inactivation of *MLH1*, since loss of *MLH1* expression by  
46  
47 IHC can often be observed in sporadic cases of endometrial cancer due to methylation of the  
48  
49 *MLH1* promoter (21). The NSCC has recently begun routinely performing hypermethylation  
50  
51  
52  
53  
54  
55  
56  
57  
58  
59  
60



1  
2  
3 testing on all *MLH1*-deficient tumors to help differentiate between sporadic and germline  
4 pathological variants, however this practice was not in place during the study period.  
5  
6  
7

8 In addition to playing an important role as a screening strategy for Lynch syndrome,  
9 tumor IHC for MMR status is becoming a key factor in identifying treatment options for patients  
10 with recurrent or advanced disease. Emerging evidence demonstrates that patients with tumor  
11 MMR protein defects, regardless whether of somatic or germline origin, tend to show response to  
12 the immunotherapeutic agent Pembrolizumab and Dostarlimab in the setting of recurrent or  
13 advanced disease(18). Patients with advanced endometrial cancer have a poor prognosis(19) and  
14 limited treatment options. Pembrolizumab has been approved in Canada since 2019 for  
15 unresectable or metastatic endometrial carcinoma with MMR defects that progressed after prior  
16 therapy and for which no other treatment options exist(20). We support the use of universal up-  
17 front tumor IHC testing in endometrial cancer patients, regardless of clinical risk factors for  
18 Lynch syndrome, in order to maximize long-term treatment options.  
19  
20  
21  
22  
23  
24  
25  
26  
27  
28  
29  
30  
31  
32  
33

34 The use of province-wide data and a relatively large population were strengths of this  
35 study. This is also the first description of the endometrial cancer population in Nova Scotia.  
36 Some limitations include inaccuracy in data collected retrospectively through databases,  
37 particularly data pertaining to personal and family history and BMI. Given the demographic risk  
38 factors for endometrial cancer in Nova Scotia, the results of this study may not be generalizable  
39 to other populations. Due to the small number of patients with Lynch syndrome, it was also  
40 beyond the scope of this study to explore the exact MMR protein defects and germline mutations  
41 in this population to see how they compare to other populations. This may be feasible as part of a  
42 larger project in the future. *MLH1* promoter hypermethylation data would have helped improve  
43 triaging women for referral to medical genetics.  
44  
45  
46  
47  
48  
49  
50  
51  
52  
53  
54  
55  
56  
57  
58  
59  
60

1  
2  
3 This study highlighted the importance of both IHC and clinical criteria in screening for  
4  
5 Lynch syndrome in endometrial cancer patients. While the incidence of Lynch syndrome in  
6  
7 patients with endometrial cancer found in this study are consistent with published literature, it is  
8  
9 suspected to be an underestimate given the low rate of high-risk women who ultimately  
10  
11 underwent germline testing. Creating clinical pathways that ensure that all eligible patients can  
12  
13 access genetic counselling is necessary for prompt diagnosis of Lynch syndrome in patients and  
14  
15 their family members, to implement risk prevention strategies, and, in cases of advanced disease,  
16  
17 help optimize treatment.  
18  
19  
20  
21  
22  
23  
24  
25  
26  
27  
28  
29  
30  
31  
32  
33  
34  
35  
36  
37  
38  
39  
40  
41  
42  
43  
44  
45  
46  
47  
48  
49  
50  
51  
52  
53  
54  
55  
56  
57  
58  
59  
60

Confidential

## References

1. Canadian Cancer Statistics Advisory Committee. Canadian Cancer Statistics 2021. Canadian Cancer Society, Statistics Canada and the Public Health Agency of Canada. 2021.
2. Renaud MC, Le T. No. 291-Epidemiology and Investigations for Suspected Endometrial Cancer. *J Obstet Gynaecol Canada* [Internet]. 2018;40(9):e703–11. Available from: <https://doi.org/10.1016/j.jogc.2018.07.005>
3. Stoffel EM, Yurgelun MB, Richard Boland C. Lynch syndrome. *Hered Color Cancer Genet Basis Clin Implic*. 2018;3–19.
4. Hampel H, Frankel W, Panescu J, Lockman J, Sotamaa K, Fix D, et al. Screening for Lynch syndrome (hereditary nonpolyposis colorectal cancer) among endometrial cancer patients. *Cancer Res*. 2006;66(15):7810–7.
5. Hampel H, Panescu J, Lockman J, Sotamaa K, Fix D, Comeras I, et al. Comment on: Screening for Lynch syndrome (hereditary nonpolyposis colorectal cancer) among endometrial cancer patients. *Cancer Res*. 2007;67(19):9603.
6. Kauff N, Berchuck A, Lu K. Chapter 3: Hereditary Gynecologic Cancers. In: *Principles and practice of gynecologic oncology* (Seventh ed). 2017.
7. *Gynecology O&A Practice Bulletin No. 147: Lynch Syndrome*. *Obstet Gynecol*. 2014;124(5):1042–54.
8. Niu BT, Hammond RFL, Leen SLS, Gilks CB, Singh N. Two versus four immunostains for Lynch syndrome screening in endometrial carcinoma. *Histopathology*. 2019;75(3):442–5.
9. Buchanan DD, Tan YY, Walsh MD, Clendenning M, Metcalf AM, Ferguson K, et al. Tumor mismatch repair immunohistochemistry and DNA MLH1 methylation testing of patients with endometrial cancer diagnosed at age younger than 60 years optimizes triage for population-level germline mismatch repair gene mutation testing. *J Clin Oncol*. 2014;32(2):90–100.
10. Spinosa D, Acosta T, Wong J, Kurtovic K, Mewshaw J, Collins S, et al. Universal screening for Lynch syndrome in uterine cancer patients : A quality improvement initiative. *Gynecol Oncol*. 2020;(January).
11. Ferguson SE, Aronson M, Pollett A, Eiriksson LR, Oza AM, Gallinger S, et al. Performance characteristics of screening strategies for lynch syndrome in unselected women with newly diagnosed endometrial cancer who have undergone universal germline mutation testing. *Cancer*. 2014;120(24):3932–9.
12. Ryan NAJ, McMahon R, Tobi S, Snowsill T, Esquibel S, Wallace AJ, et al. The proportion of endometrial tumours associated with Lynch syndrome (PETALS): A prospective cross-sectional study. *PLoS Med* [Internet]. 2020;17(9):1–19. Available from: <http://dx.doi.org/10.1371/journal.pmed.1003263>

13. Tangjitgamol S, Kittisiam T, Tanvanich S. Prevalence and prognostic role of mismatch repair gene defect in endometrial cancer patients. *Tumor Biol.* 2017;39(9).
14. Kahn RM, Gordhandas S, Maddy BP, Baltich Nelson B, Askin G, Christos PJ, et al. Universal endometrial cancer tumor typing: How much has immunohistochemistry, microsatellite instability, and MLH1 methylation improved the diagnosis of Lynch syndrome across the population? *Cancer.* 2019;125(18):3172–83.
15. Snowsill TM, Ryan NAJ, Crosbie EJ, Frayling IM, Gareth Evans D, Hyde CJ. Cost-effectiveness analysis of reflex testing for Lynch syndrome in women with endometrial cancer in the UK setting. *PLoS One.* 2019;14(8):1–18.
16. Shia J, Holck S, Depetris G, Greenson JK, Klimstra DS. Lynch syndrome-associated neoplasms: A discussion on histopathology and immunohistochemistry. *Fam Cancer.* 2013;12(2):241–60.
17. Lawrence J, Richer L, Arseneau J, Zeng X, Chong G, Weber E, et al. Mismatch repair universal screening of endometrial cancers (Muse) in a canadian cohort. *Curr Oncol.* 2021;28(1):509–22.
18. Aravantinou-Fatorou A, Andrikopoulou A, Lontos M, Fiste O, Georgakopoulou VE, Dimopoulos MA, et al. Pembrolizumab in endometrial cancer: Where we stand now (Review). *Oncol Lett.* 2021;22(6).
19. Canadian Cancer Society. Survival statistics for uterine cancer [Internet]. Available from: <https://cancer.ca/en/cancer-information/cancer-types/uterine/prognosis-and-survival/survival-statistics>
20. Health Canada. Keytruda - Notice of Compliance with Conditions – Qualifying Notice [Internet]. 2020. Available from: <https://www.canada.ca/en/health-canada/services/drugs-health-products/drug-products/notice-compliance/conditions/keytruda-qualifying-notice-218779.html>

**Table 1.** Characteristics of 465 Nova Scotia women diagnosed with endometrial cancer between 2017 – 2020.

| Characteristic                                    | No. (%)    | Mean (range)     |
|---------------------------------------------------|------------|------------------|
| Age at diagnosis (years)                          |            | 64 (29 – 95)     |
| ≤ 60 years old                                    | 166 (35.7) |                  |
| > 60 years old                                    | 299 (64.3) |                  |
| Body mass index (BMI)                             |            | 34.9 (15.8 – 68) |
| < 18.5                                            | 4 (0.9)    |                  |
| 18.5 – 24.9                                       | 58 (12.5)  |                  |
| 25 – 29.9                                         | 92 (19.8)  |                  |
| 30 – 34.9                                         | 106 (22.8) |                  |
| 35 – 39.9                                         | 64 (13.8)  |                  |
| ≥ 40.0                                            | 132 (28.4) |                  |
| Not reported                                      | 9 (1.9)    |                  |
| Histology                                         |            |                  |
| Endometrioid                                      | 398 (85.6) |                  |
| Clear cell                                        | 14 (3.0)   |                  |
| Serous                                            | 12 (2.6)   |                  |
| Mixed carcinoma                                   | 12 (2.6)   |                  |
| MMMT <sup>1</sup>                                 | 11 (2.4)   |                  |
| Other                                             | 18 (3.9)   |                  |
| FIGO Grade                                        |            |                  |
| 1                                                 | 304 (65.4) |                  |
| 2                                                 | 58 (12.5)  |                  |
| 3                                                 | 102 (21.9) |                  |
| Not reported                                      | 1 (0.2)    |                  |
| FIGO Stage                                        |            |                  |
| 1                                                 | 338 (72.7) |                  |
| 2                                                 | 27 (5.8)   |                  |
| 3                                                 | 47 (10.1)  |                  |
| 4                                                 | 25 (5.4)   |                  |
| Unable to stage                                   | 28 (6.0)   |                  |
| Family history of Lynch-associated cancer         |            |                  |
| Yes                                               | 66 (14.2)  |                  |
| No                                                | 78 (16.8)  |                  |
| Unknown                                           | 321 (69.0) |                  |
| Personal history of other Lynch-associated cancer |            |                  |
| Yes                                               | 26 (5.6)   |                  |
| No                                                | 125 (26.9) |                  |
| Unknown                                           | 314 (67.5) |                  |

<sup>1</sup> MMT: malignant mixed Müllerian tumor

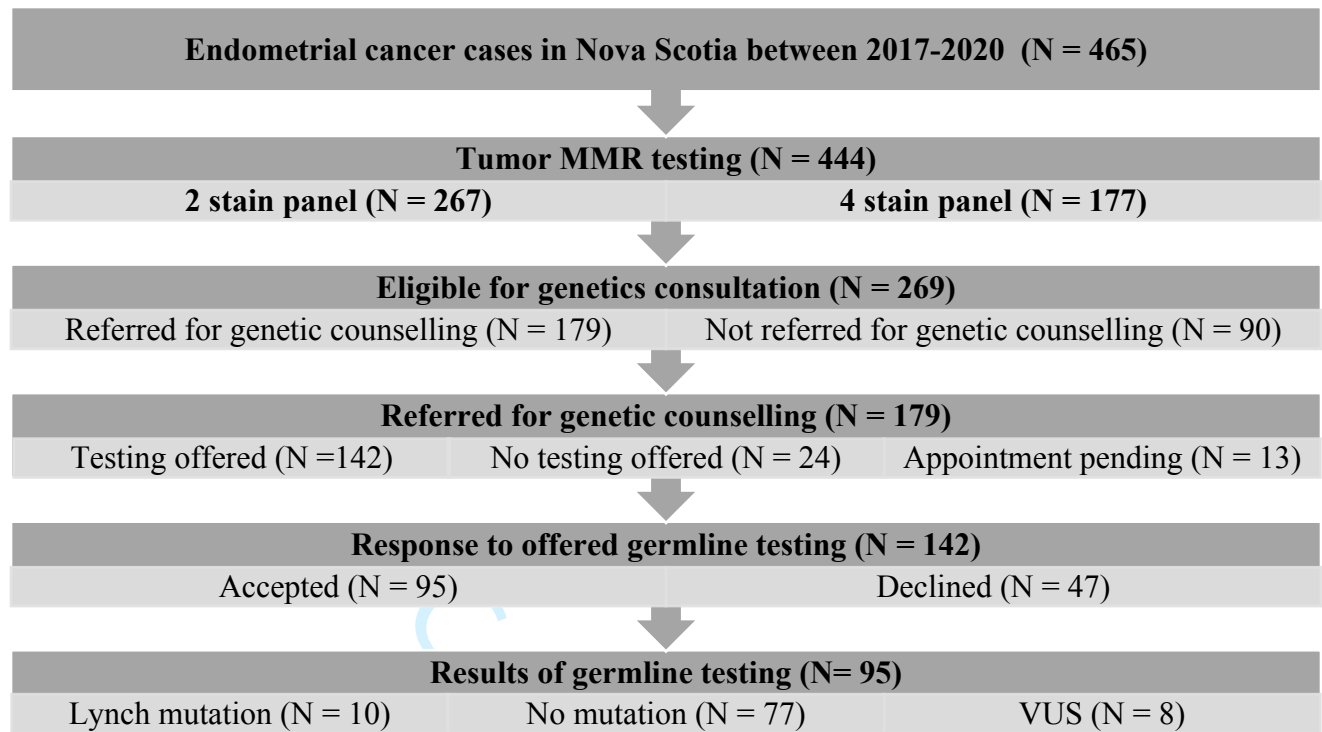

27  
28  
29  
30  
31  
32  
33  
34  
35  
36  
37  
38  
39  
40  
41  
42  
43  
44  
45  
46  
47  
48  
49  
50  
51  
52  
53  
54  
55  
56  
57  
58  
59  
60

**Figure 1.** Tumor MMR testing and germline testing for Lynch syndrome in 465 Nova Scotia women from 2017-2020.
